# Supplementary material
Source: PubMed Central journal article supplement (PMC404317)
Supplement: 7600196s1.pdf [file 7600196s1.pdf]

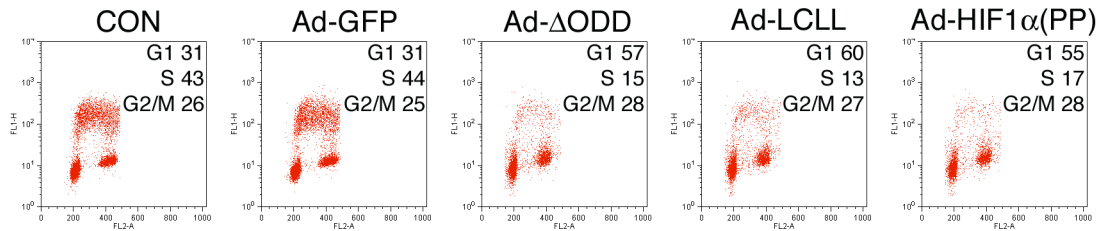

**Supplementary Figure 1.** Stable full-length HIF-1  $\alpha$  and  $\Delta$ ODD mutants induce cell cycle arrest in normoxia.

HCT116 cells were analyzed for BrdU incorporation after infection with adenoviruses expressing GFP (*Ad-GFP*),  $\Delta$ ODD (*Ad- $\Delta$ ODD*),  $\Delta$ ODD LCLL (*Ad-LCLL*), and a full-length HIF-1  $\alpha$ P402A-P654A mutant (*Ad-HIF1 $\alpha$ (PP)*). The original data are presented, together with the percentage of each phase in the inlet. *CON*, no infection.
