# Supplementary material
Source: PubMed Central journal article supplement (PMC404317)
Supplement: 7600196s2.pdf [file 7600196s2.pdf]

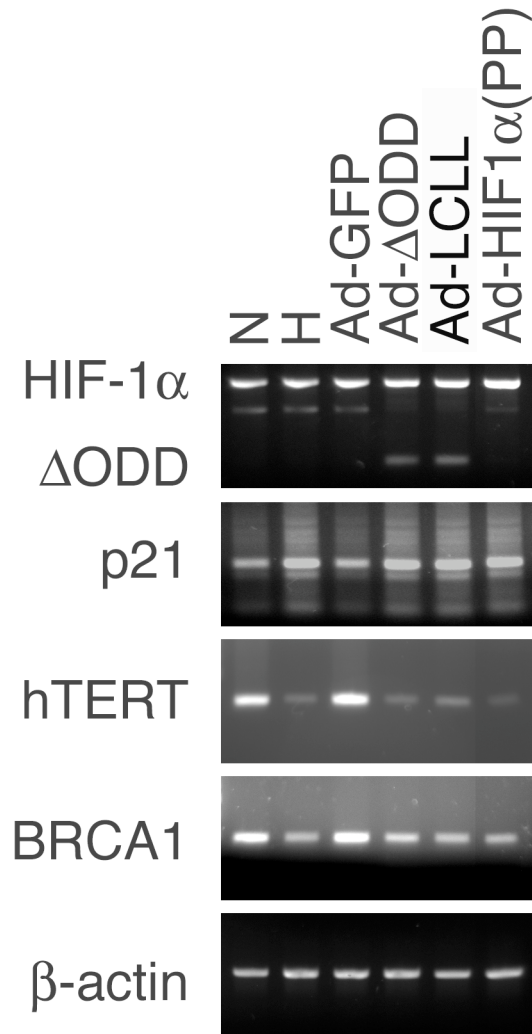

**Supplementary Figure 2.** Stable full-length HIF-1  $\alpha$  and  $\Delta$ ODD LCLL mutant alter Myc target gene expression.

Various mRNA levels, as indicated, were determined by RT-PCR in HCT116 cells that had been subjected to hypoxia or specified adenoviral infections.
