# Supplementary material
Source: PubMed Central journal article supplement (PMC404317)
Supplement: 7600196s3.pdf [file 7600196s3.pdf]

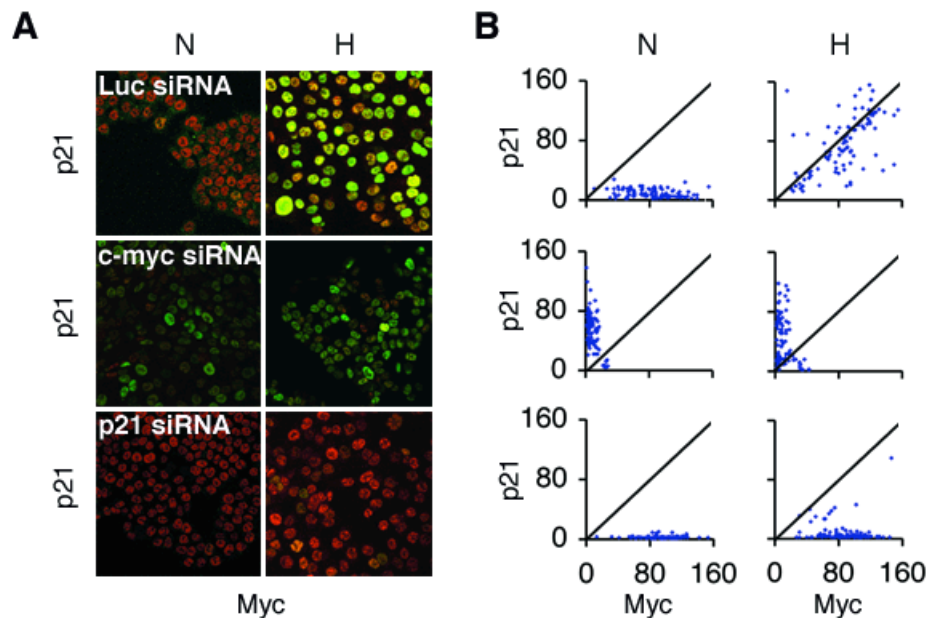

**Supplementary Figure 3.** *c-myc* and *p21cip1* siRNAs abrogate respective staining of immunofluorescence.

(A) HCT116 cells were subjected to siRNA targeting luciferase gene (*Luc siRNA*), *c-myc* (*c-myc siRNA*), or *p21cip1* (*p21 siRNA*). After incubation either in normoxia (N) or hypoxia (H), these cells were stained by immunofluorescence with anti-Myc (in red) and anti-p21cip (in green) antibodies. Only merged images are presented. (B) Myc expression levels from 100 individual cells in A were plotted in dots along x-axis against those of p21cip1 in y-axis. Cells expressing both proteins are depicted in dots along the diagonal lines. The *Luc* siRNA (5'-AACGTACGCGGAATACTTCGA-3') was synthesized from Qiagen, and *p21cip1* siRNA (SureSilencing human CDKN1A siRNA kit) was purchased from SuperArray.
