# Supplementary material
Source: PubMed Central journal article supplement (PMC404317)
Supplement: 7600196s4.pdf [file 7600196s4.pdf]

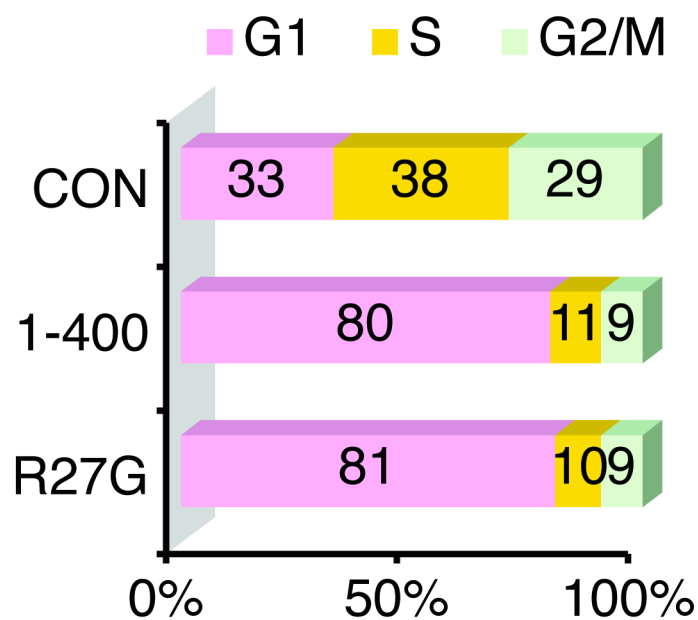

**Supplementary Figure 4.** N-terminal HIF-1  $\alpha$  does not rely on its DNA binding to induce cell cycle arrest.

HCT116 cells were transfected with 1  $\mu$ g of pcDNA3 (CON), p(HA)HIF-1  $\alpha$ 1-400 (1-400), or p(HA)HIF-1  $\alpha$ 1-400 R27G (R27G), plus 0.1  $\mu$ g pEGFP-F (Clontech). Cell cycle profiles of the GFP-positive population were analyzed as described in Materials and Methods. The percentage of each phase is shown in a bar graph.
